# Supplementary material for: Investigating Plant Responses to Water Stress via Plant Hydraulics Pathway
Source: Copernicus journal article supplement (doi:10.5194/egusphere-2024-2940), 2024-10-15
Supplement: Supplementary file 1 [file egusphere-2024-2940-supplement.pdf]

### S1 Calibrated leaf area index

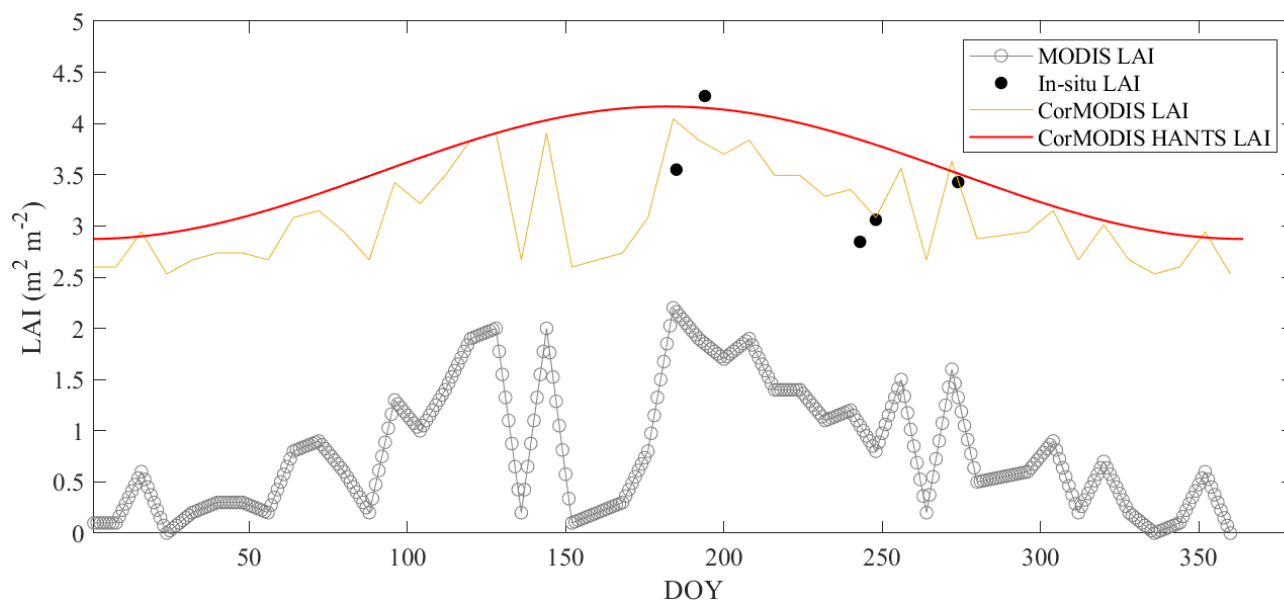

**Fig. S1 Comparison between MODIS LAI and HANTS fitted LAI after bias correction with in-situ observed LAI. MODIS LAI: original LAI obtained from MODIS data; In-situ LAI: observed LAI; CorMODIS LAI: bias-corrected MODIS LAI data; CorMODIS HANTS LAI: HANTS fitted MODIS LAI after bias correction.**

5

## S2 Comparison of simulation and observation

### S2.1 Soil moisture

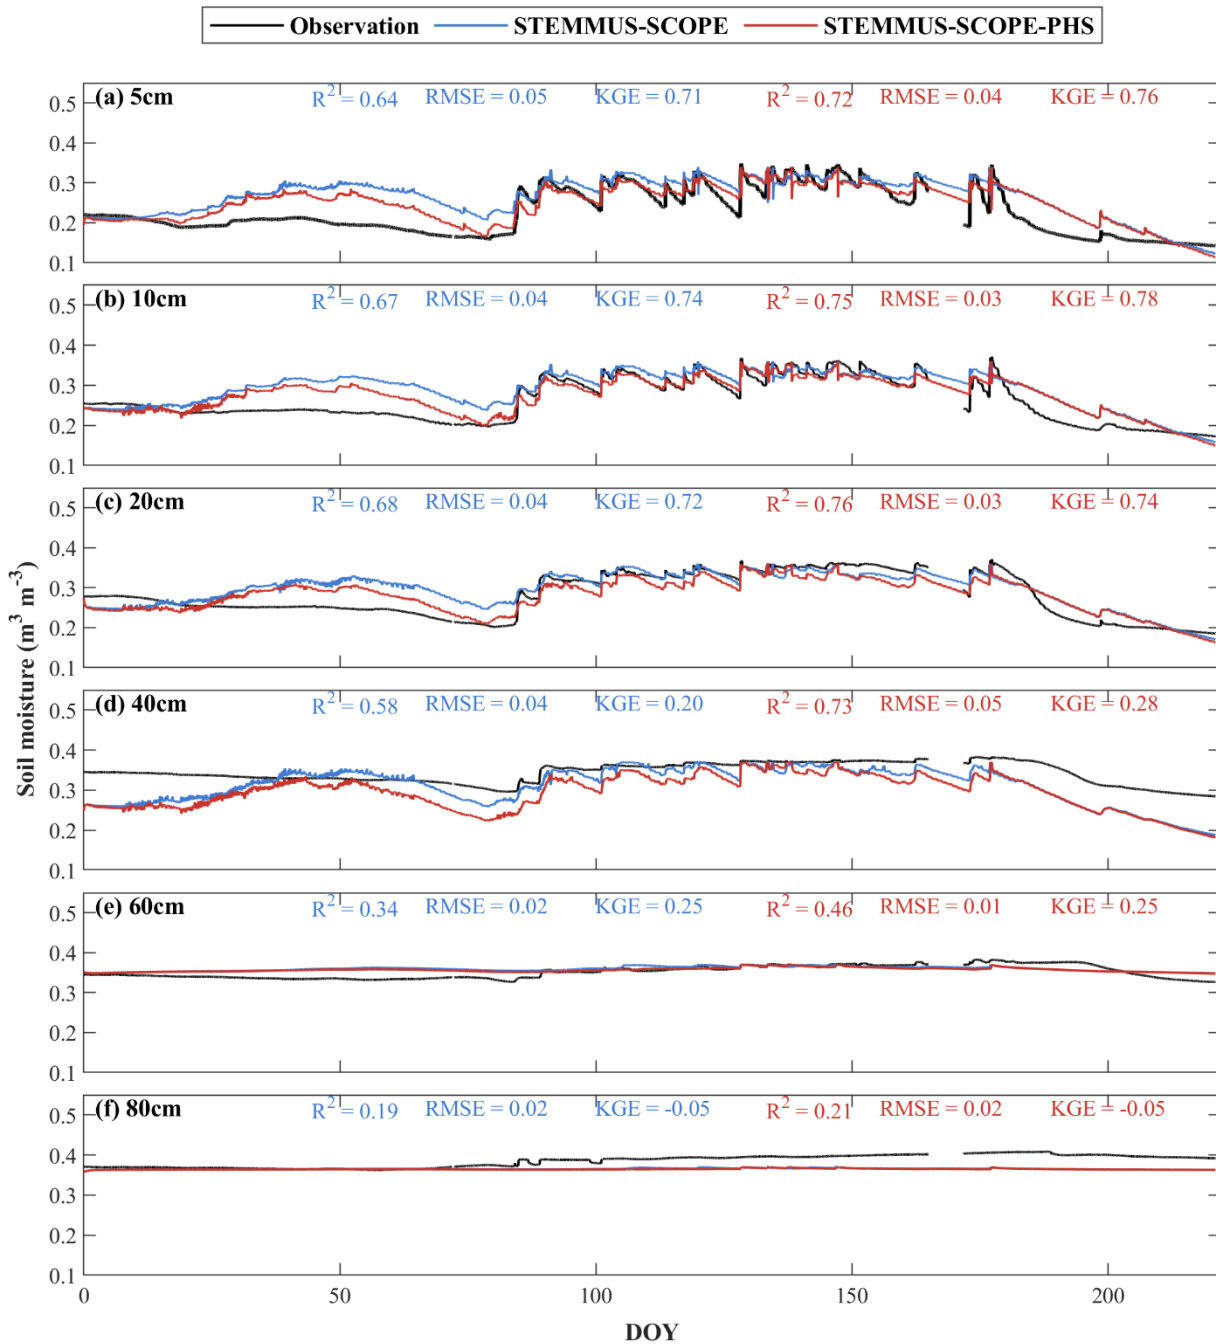

10 Fig. S2 Comparison of simulated and observed soil moisture at the depth of 5, 10, 20, 40, 60 and 80 cm. The blue and red lines are the results of STEMMUS-SCOPE and STEMMUS-SOCPE-PHS, respectively.

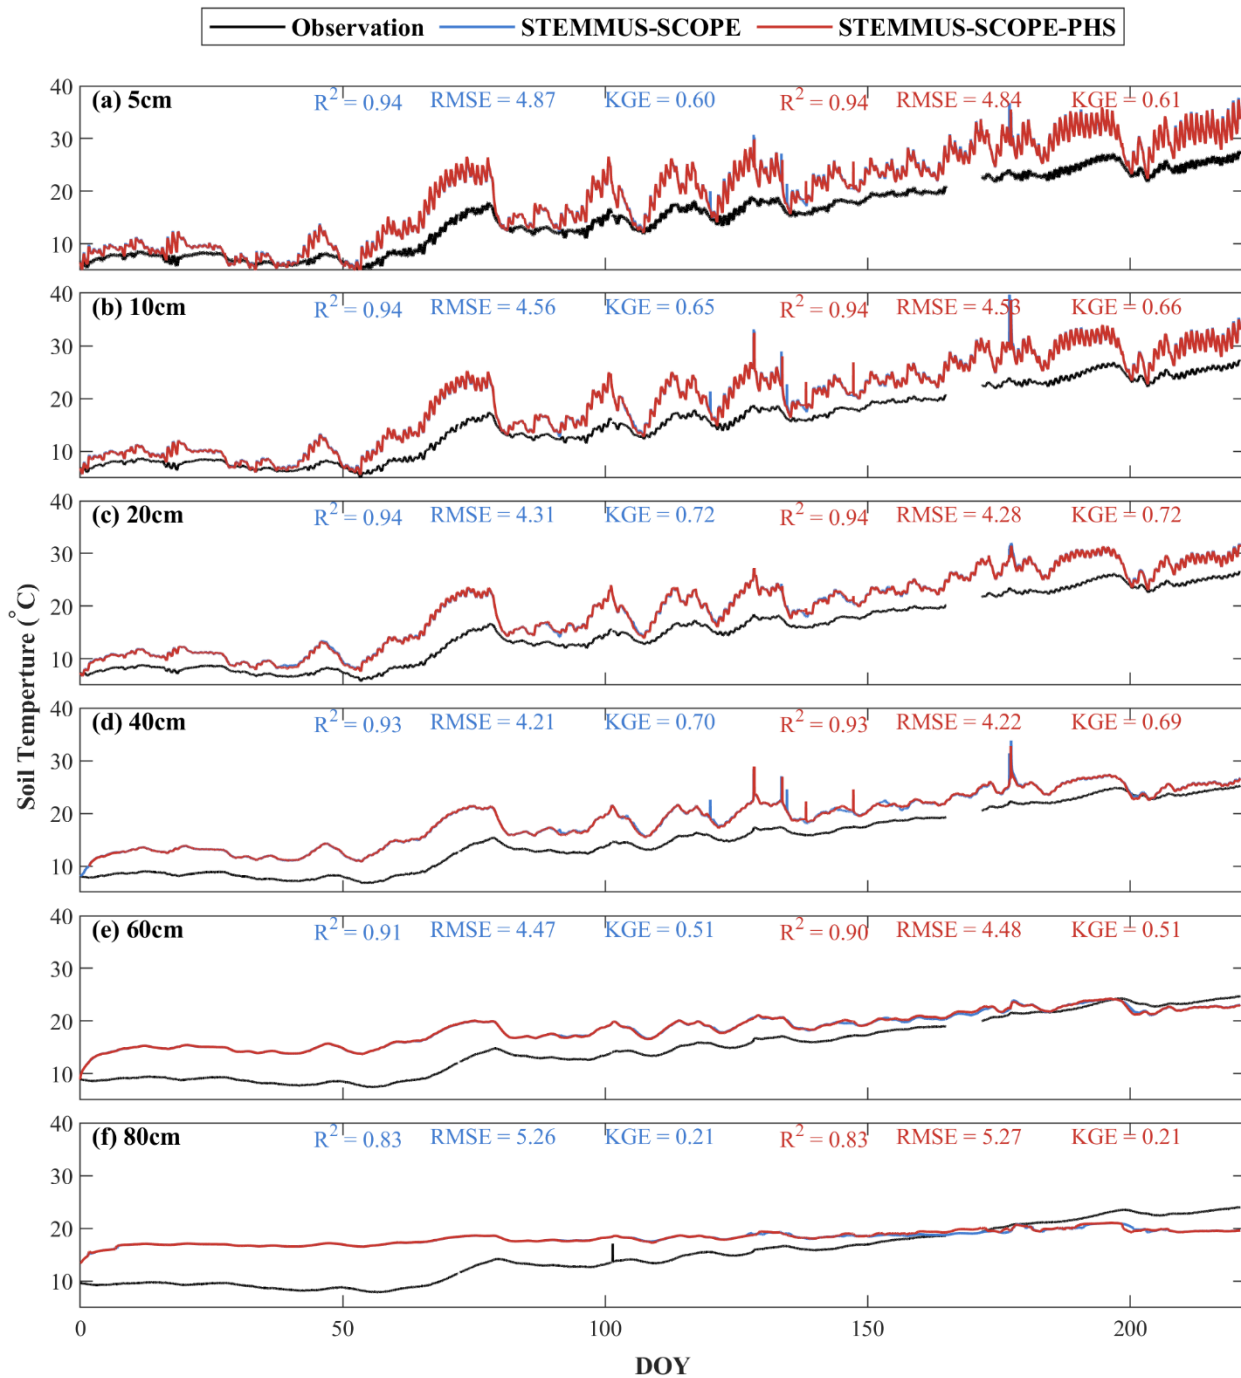

Fig. S3 Comparison of simulated and observed soil temperature at the depth of 5, 10, 20, 40, 60 and 80 cm. The blue and red lines are the results of STEMMUS-SCOPE and STEMMUS-SOCPE-PHS, respectively.

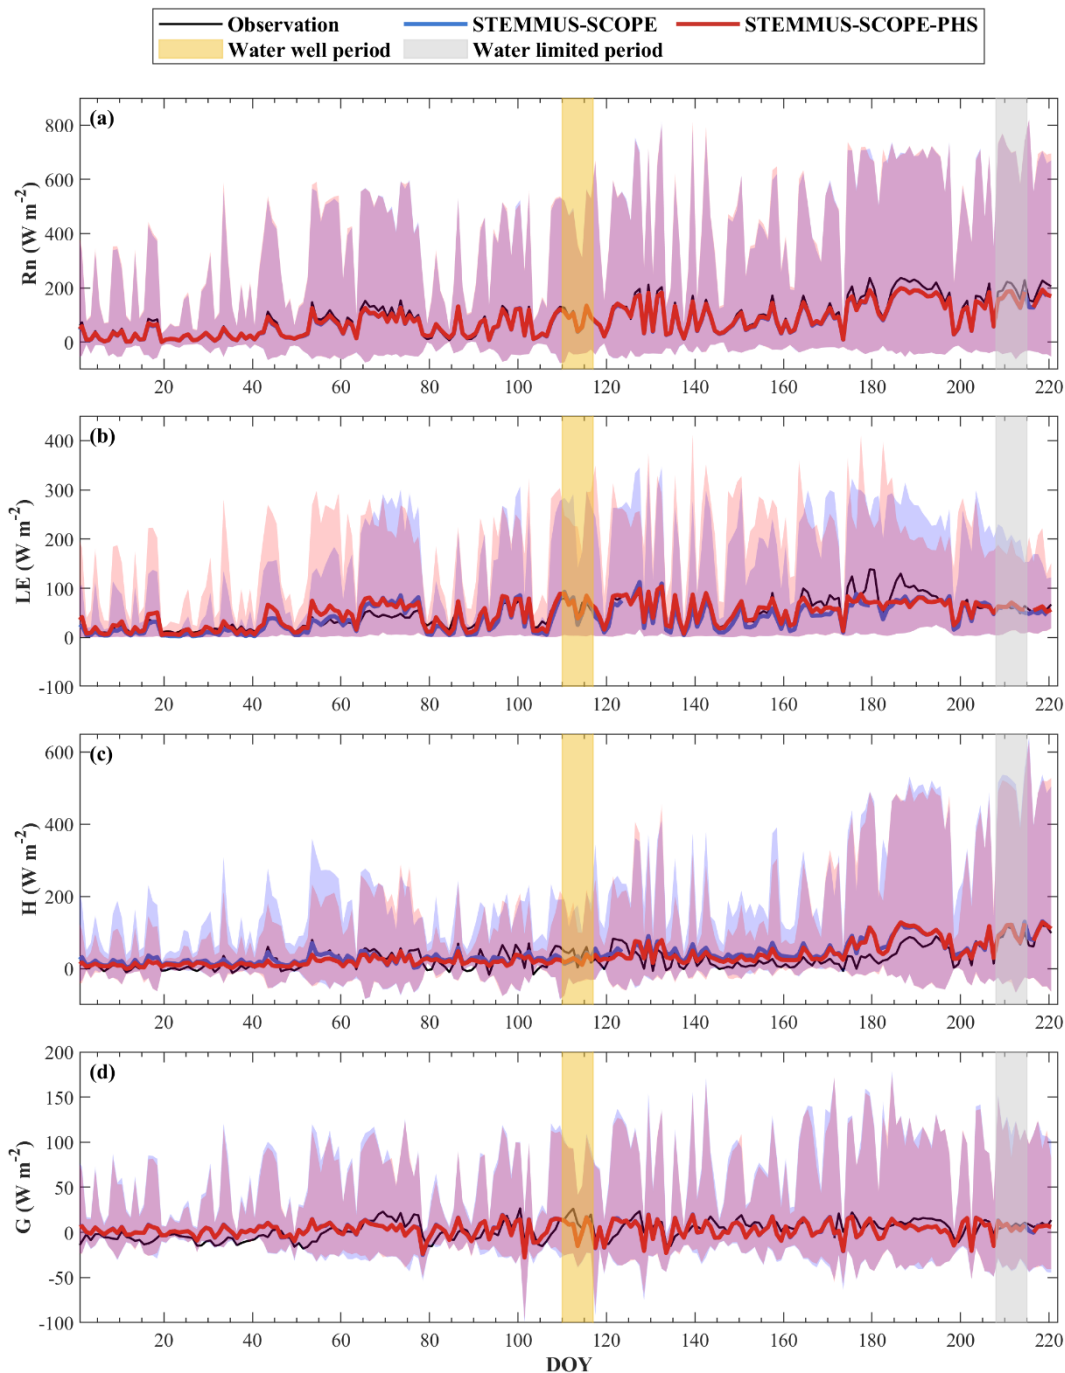

**Fig. S4 Comparing simulated and observed net radiation (a), latent heat flux (b), sensible heat flux (c) and soil heat flux (d). The blue and red line are the simulation from STEMMUS-SCOPE and STEMMUS-SCOPE-PHS, respectively. The water-well period and water-limited period are marked in yellow and grey, respectively.**

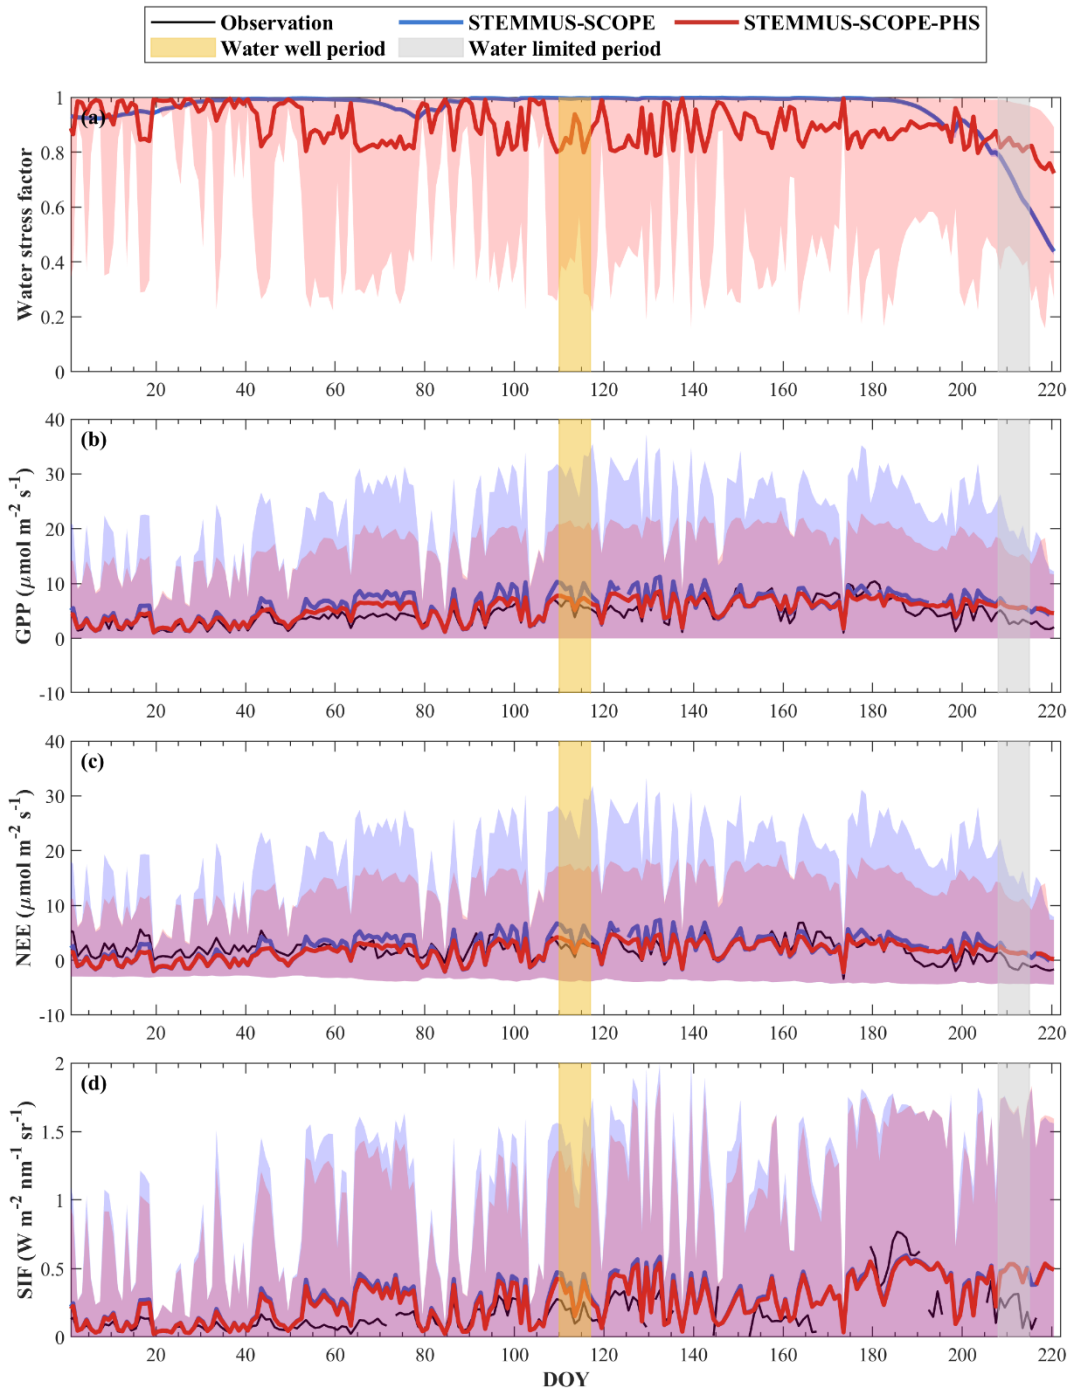

Fig. S5 Comparing (a) simulated water stress factor (b) simulated and observed GPP, (c) simulated and observed NEE, (d) simulated and observed SIF. The blue and red line are the simulation from STEMMUS-SCOPE and STEMMUS-SCOPE-PHS, respectively.

25 The water stress factors are not observed, so only the results from two models were shown. The water-well period and water-limited period are marked in yellow and grey, respectively.

**S3 List of variables and parameters.**

**Table S1: Forcing data**

| Variables        | Description                     | Unit                           |
|------------------|---------------------------------|--------------------------------|
| Canopy_high      | Time series canopy height       | m                              |
| CO2air           | Concentration of carbon dioxide | ppm                            |
| IGBP_veg_long    | Plant function types            | -                              |
| LAI              | Leaf area index                 | m <sup>2</sup> m <sup>-2</sup> |
| LWdown           | Longwave downward radiation     | W m <sup>-2</sup>              |
| Precip           | Precipitation                   | mm s <sup>-1</sup>             |
| Psurf            | Air pressure                    | Pa                             |
| Qair             | Near surface specific humidity  | kg kg <sup>-1</sup>            |
| RH               | Relative humidity               | %                              |
| SWdown           | Shortwave downward radiation    | W m <sup>-2</sup>              |
| Tair             | Air temperature                 | K                              |
| VPD              | Vapor pressure deficit          | hPa                            |
| Wind             | Wind speed                      | m s <sup>-1</sup>              |
| reference_height | Reference height                | m                              |

**Table S2: Initial condition**

| Variable  | Soil Depth<br>(cm) | Variable | Initial soil temperature<br>(°C) | Variable | Initial soil moisture<br>(m <sup>3</sup> m <sup>-3</sup> ) |
|-----------|--------------------|----------|----------------------------------|----------|------------------------------------------------------------|
| -         | 0                  | InitT0   | 5.569                            | InitX0   | 0.2000                                                     |
| InitND1   | 5                  | InitT1   | 6.445                            | InitX1   | 0.2200                                                     |
| InitND2   | 10                 | InitT2   | 6.837                            | InitX2   | 0.2551                                                     |
| InitND3   | 20                 | InitT3   | 7.300                            | InitX3   | 0.3000                                                     |
| InitND4   | 40                 | InitT4   | 8.120                            | InitX4   | 0.3253                                                     |
| InitND5   | 60                 | InitT5   | 8.880                            | InitX5   | 0.3500                                                     |
| InitND6   | 80                 | InitT6   | 9.640                            | InitX6   | 0.3695                                                     |
| Tot_depth | 100                | BtmT     | 14.500                           | BtmX     | 0.3700                                                     |

30

**Table 3 Soil hydraulics parameters**

| Soil depth<br>(cm) | SaturatedK<br>(cm d <sup>-1</sup> ) | SaturatedMC<br>(m <sup>3</sup> m <sup>-3</sup> ) | ResidualMC<br>(m <sup>3</sup> m <sup>-3</sup> ) | Coefficient_n<br>(m <sup>3</sup> m <sup>-3</sup> ) | Coefficient_Alpha<br>(m <sup>3</sup> m <sup>-3</sup> ) | FieldMC<br>(m <sup>3</sup> m <sup>-3</sup> ) | Porosity<br>(m <sup>3</sup> m <sup>-3</sup> ) |
|--------------------|-------------------------------------|--------------------------------------------------|-------------------------------------------------|----------------------------------------------------|--------------------------------------------------------|----------------------------------------------|-----------------------------------------------|
| 5                  | 70                                  | 0.340                                            | 0.030                                           | 1.3348                                             | 0.0085                                                 | 0.300                                        | 0.340                                         |
| 10                 | 40                                  | 0.360                                            | 0.060                                           | 1.3100                                             | 0.0088                                                 | 0.300                                        | 0.360                                         |
| 20                 | 22                                  | 0.360                                            | 0.060                                           | 1.2900                                             | 0.0088                                                 | 0.300                                        | 0.360                                         |
| 40                 | 22                                  | 0.370                                            | 0.060                                           | 1.2800                                             | 0.0088                                                 | 0.300                                        | 0.370                                         |
| 60                 | 1                                   | 0.370                                            | 0.080                                           | 1.0900                                             | 0.0093                                                 | 0.260                                        | 0.370                                         |
| 80                 | 1                                   | 0.370                                            | 0.080                                           | 1.0900                                             | 0.0111                                                 | 0.260                                        | 0.370                                         |

\* SaturatedK is saturated soil hydraulic conductivity, SaturatedMC is saturated soil moisture, ResidualMC is residual soil moisture, Coefficient\_n and Coefficient\_Alpha are parameters in van Genuchten model, FieldMC is field capacity.

35

**Table 4 Plant hydraulics parameter used in this study.**

| Parameter        | Description                                                    | Unit                   | Value  |
|------------------|----------------------------------------------------------------|------------------------|--------|
| B2C              | The ratio to transfer biomass to carbon                        | gC gDM <sup>-1</sup> * | 0.488  |
| $K_{root_{max}}$ | Maximum root hydraulic conductivity                            | m s <sup>-1</sup>      | 2e-9   |
| $K_{stem_{max}}$ | Maximum stem hydraulic conductivity                            | m s <sup>-1</sup>      | 4e-8   |
| $K_{leaf_{max}}$ | Maximum leaf hydraulic conductance                             | s <sup>-1</sup>        | 4e-8   |
| L                | Root lateral length                                            | m                      | 0.25   |
| $P50_{leaf}$     | Water potential at 50% leaf hydraulics conductance loss        | m                      | -67.67 |
| $P50_{stem}$     | Water potential at 50% stem hydraulic conductance loss         | m                      | -342   |
| $P50_{root}$     | Water potential at 50% root hydraulic conductance loss         | m                      | -30    |
| RTB              | Initial root total biomass                                     | g m <sup>-2</sup>      | 300    |
| $r_{root}$       | Root radius                                                    | m                      | 1.5e-3 |
| $s2l$            | The fraction of stem area index (SAI) to leaf area index (LAI) | -                      | 0.1    |
| $a_{leaf}$       | Shape factor                                                   | -                      | 1.98   |
| $a_{stem}$       | Shape factor                                                   | -                      | 1.98   |
| $a_{root}$       | Shape factor                                                   | -                      | 0.8    |
| $\rho_{root}$    | Root density                                                   | gDM m <sup>-3</sup>    | 250000 |

\*DM is dry matter.
